# Supplementary material
Source: PubMed Central journal article supplement (PMC6169995)
Supplement: NIHMS1501905-supplement-1.pdf [file NIHMS1501905-supplement-1.pdf]

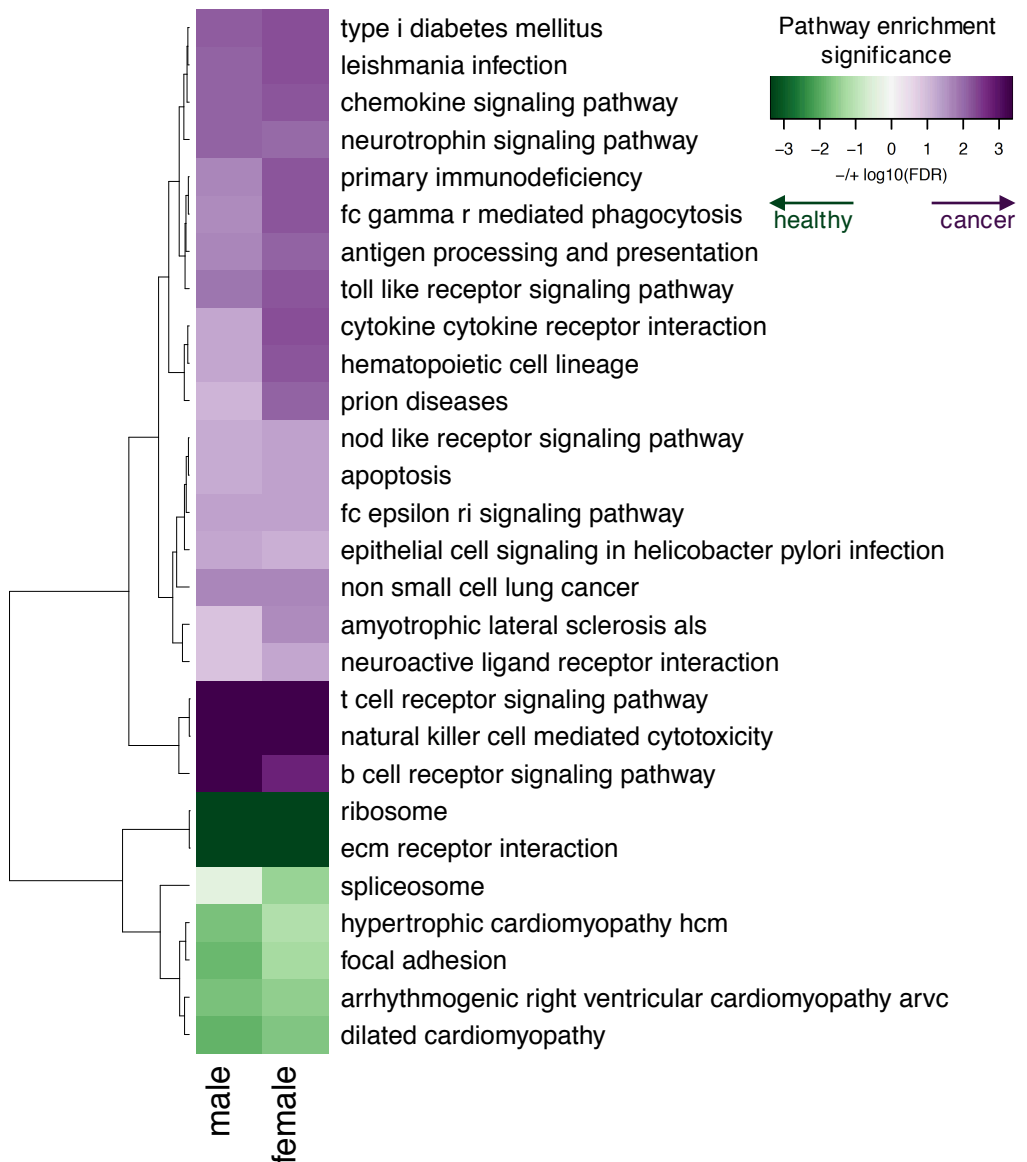

**Figure S1. Pathways differentially targeted between healthy and colon cancer tissues.** GSEA performed on male or female samples, the heatmap shows the KEGG pathways with significant differential enrichment between healthy and cancer tissues (FDR<0.05). FDR significance is reported based on the  $\log_{10}(\text{FDR})$  scale, with enrichment in healthy tissue shown in green and in cancer tissue shown in purple.
