# Supplementary material
Source: PubMed Central journal article supplement (PMC6169995)
Supplement: NIHMS1501905-supplement-2.pdf [file NIHMS1501905-supplement-2.pdf]

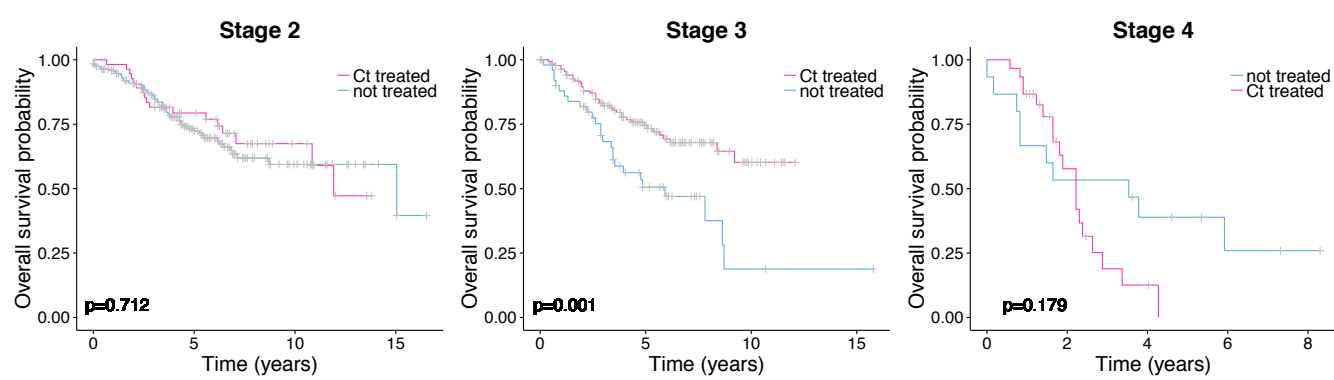

**Figure S2. Overall survival analysis based on chemotherapy treatment.** Kaplan-Meier curve of colon patients treated with adjuvant chemotherapy (pink) or not treated (blue) in each clinical stage. P-values were computed by the log-rank test to evaluate the overall survival risk between treated and not treated subgroups of patients.
